# Supplementary material for: Quantification of estrogens in infant formulas by isotope dilution liquid chromatography-tandem mass spectrometry
Source: Royal Society of Chemistry journal article supplement (doi:10.1039/c8ay01101j), 2018-01-01
Supplement: c8ay01101j1.pdf [file c8ay01101j1.pdf]

## Electronic Supplementary Information

### Quantification of Estrogens in Infant Formula by Isotope Dilution Liquid Chromatography-tandem Mass Spectrometry

Shuan Liu,<sup>a, b</sup> Xiaomin Li,<sup>b,\*</sup> Yingchen Zhao,<sup>b</sup> Xiong Yin,<sup>a,\*</sup> Qinghe Zhang,<sup>b</sup> Xiuqin Li,<sup>b</sup> Guangshi Tang<sup>a,\*</sup> and Hongmei Li<sup>b</sup>

<sup>a</sup> State Key Laboratory of Chemical Resource Engineering, School of Science, Beijing University of Chemical Technology, Beijing 100029, P. R. China

<sup>b</sup> Laboratory of Food Safety, Division of Metrology in Chemistry, National Institute of Metrology, China, Beijing 100029, P. R. China.

†Corresponding Authors:

Dr. **X. Li** Tel.: +86-10-64524784; Fax: +86-10-64524783 E-mail: lixm@nim.ac.cn;

Dr. **X. Yin** Tel: +86-10-64433197, Fax: +86-10-64421755 E-mail: yinxiong@mail.buct.edu.cn

Dr. **G. Tang** E-mail: tanggs@mail.buct.edu.cn.

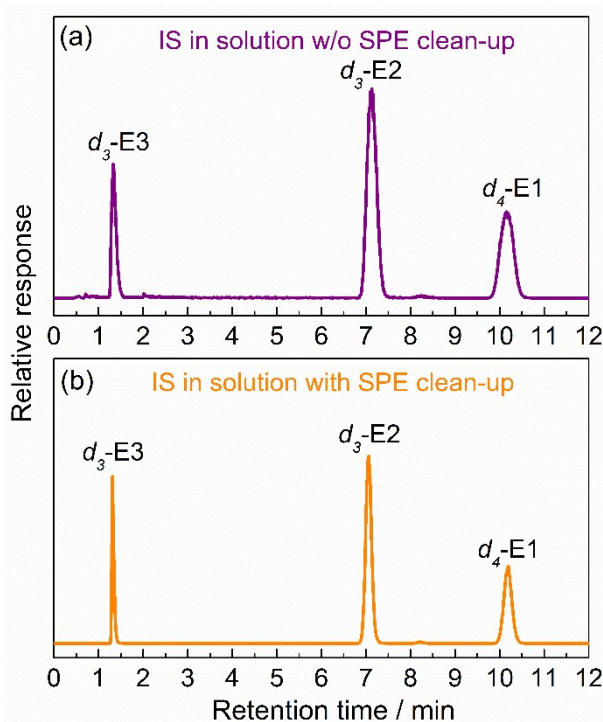

**Figure S1.** HPLC-MS/MS chromatograms of internal standards (IS) in the solution: (a) spiked sample after extraction step without SPE clean-up; (b) spiked sample with SPE clean-up step.
